# Supplementary material for: The sensitivity of the yeast, Saccharomyces cerevisiae, to acetic acid is influenced by DOM34 and RPL36A
Source: PeerJ. 2017 Nov 14;5:e4037. doi: 10.7717/peerj.4037 (PMC5691786; doi:10.7717/peerj.4037)
Supplement: File S3 — Overexpression of DOM34 and RPL36A compensated for deletion of genes involved in ribosome biogenesis. [file peerj-05-4037-s004.xlsx]

## Sheet: Suppl-3
List of gene deletion mutants compensated by overexpression of DOM34 and RPL36A in different treatment condition. Overexpression of DOM34 and RPL36A compensated for deletion of genes involved in ribosome biogenesis.
RPL36A overexpress				DOM34 overexpress
Cycloheximide	Rapamycin			Cycloheximide	Rapamycin
ASC1	ANB1			ASC1	ANB1
DPH2	BUD21			RPL21B	BRR1				Treatment condition condition:
NOP16	CYC1			YER081W	CYC1				Acetic acid treatment (220 mM) for 2 hours
RMT2	HAP4			YMR172W	GBP2				Cycloheximide (60 ng/ml)
TEF4	HSC82			YOL115W	HAP4				Heat shock (37 ᵒC)
YDR535C	ISY1			YPL086C	HHO1				Paromomycin (22 mg/ml)
YER081W	JJJ1			Heat shock	JJJ1				Rapamycin condition (6ng/ml)
YKL205W	MRN1			BRR1	MET17
YMR172W	NEW1			BUD21	NEW1				We investigated the ability of the overexpression of DOM34 and RPL36A genes to compensate
YPL086C	RKM5			CDC26	RKM4				the sick phenotype of different gene deletion strains in response to heat shock, acetic acid, cycloheximide, paromomycin and rapamycin treatments
Heat shock	RPL17B			IMG2	RPL12B
BRR1	RPL24B			ISY1	RPL17B
BUD21	RPL27A			LOC1	RPL27A
BUD27	RPL31B			OAZ1	RPL37B
IMG2	RPL38			PET54	RPS1A
ISY1	RPP1A			YAL012W	TAE2
OAZ1	RPS18A			Acetic Acid	TIF4632
PET54	RPS1A			DOM34	URE2
YDR515W	RPS7B			GAS2	URN1
YNL087W	STM1			HSC82	YAK1
Acetic Acid	TAE2			HSP30	YLR149C
ALB1	TIF4632			LOC1	YNL323W
ANB1	TOR1			NCL1	YPL067C
BUD23	TRP1			PET123	YPL197C
GAS2	URE2			RPS21A	YPR014C
HSC82	URN1			RPS29B	YPR197C
LOC1	VPS35			RSA3	paromomycin
PET123	VPS70			SUC2	ASC1
RPL34A	YIL096C			YAR018C	BUD23
RPL36A	YFL034W			YDL088C	RPL43A
RPP1A	YKL068W			YDR378C	RPS16A
RPS18A	YLR149C			YIL096C	RPS9B
TEF4	YOL114C			YIL096C	YER081W
YAR1	YPL086C			YPL048W
YDL088C	YPR014C
YFL031W	paromomycin
YIL096C	ASC1
YJL152W	RPS18A
	RPS9B
	YHR121W

## Sheet: systematic gene names 
Gene names	systematic gene names
ASC1	YMR116C
DPH2	YKL191W
NOP16	YER002W
RMT2	YDR465C
TEF4	YKL081W
YDR535C	YDR535C
SER3	YER081W
LOS1	YKL205W
HOT1	YMR172W
ELP3	YPL086C
BRR1	YPR057W
BUD21	YOR078W
BUD27	YFL023W
IMG2	YCR071C
ISY1	YJR050W
OAZ1	YPL052W
PET54	YGR222W
SLF1	YDR515W
TCB2	YNL087W
ALB1	YJL122W
ANB1	YJR047C
BUD23	YCR047C
GAS2	YLR343W
HSC82	YMR186W
LOC1	YFR001W
PET123	YOR158W
RPL34a	YER056C-A
RPL36a	YMR194W
RPP1a	YDL081C
RPS18a	YDR450W
YAR1	YPL239W
ASM4	YDL088C
HAC1	YFL031W
BMT5	YIL096C
YJL152W	YJL152W
CYC1	YJR048W
HAP4	YKL109W
JJJ1	YNL227C
MRN1	YPL184C
NEW1	YPL226W
RKM5	YLR137W
RPL17b	YJL177W
RPL24b	YGR148C
RPL27a	YHR010W
RPL31b	YLR406C
RPL38	YLR325C
RPS1a	YLR441C
RPS7b	YNL096C
STM1	YLR150W
TAE2	YPL009C
TIF4632	YGL049C
TOR1	YJR066W
TRP1	YDR007W
URE2	YNL229C
URN1	YPR152C
VPS35	YJL154C
VPS70	YJR126C
MIL1	YFL034W
NUP100	YKL068W
YLR149C	YLR149C
PTH4	YOL114C
YPR014C	YPR014C
RPS9b	YBR189W
LSM12	YHR121W
RPL21b	YPL079W
PAP2	YOL115W
GBP2	YCL011C
HHO1	YPL127C
MET17	YLR303W
RKM4	YDR257C
RPL12b	YDR418W
RPL37b	YDR500C
YAK1	YJL141C
LEM3	YNL323W
YPL067C	YPL067C
YPL197C	YPL197C
YPR197C	YPR197C
CDC26	YFR036W
CYS3	YAL012W
DOM34	YNL001W
HSP30	YCR021C
NCL1	YBL024W
RPS21a	YKR057W
RPS29b	YDL061C
RSA3	YLR221C
SUC2	YIL162W
KIN3	YAR018C
LSM6	YDR378C
CAM1	YPL048W
RPL43a	YPR043W
RPS16a	YMR143W
