# Supplementary material for: The sensitivity of the yeast, Saccharomyces cerevisiae, to acetic acid is influenced by DOM34 and RPL36A
Source: PeerJ journal article supplement (doi:10.7717/peerj.4037), 2017-11-14

# PELO - Figure

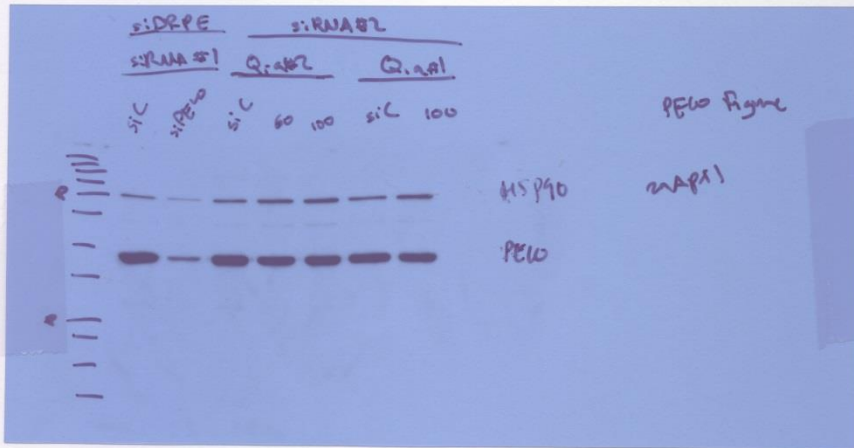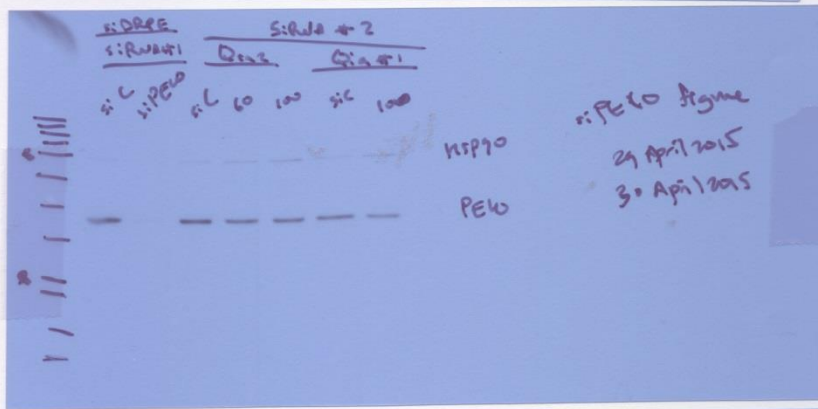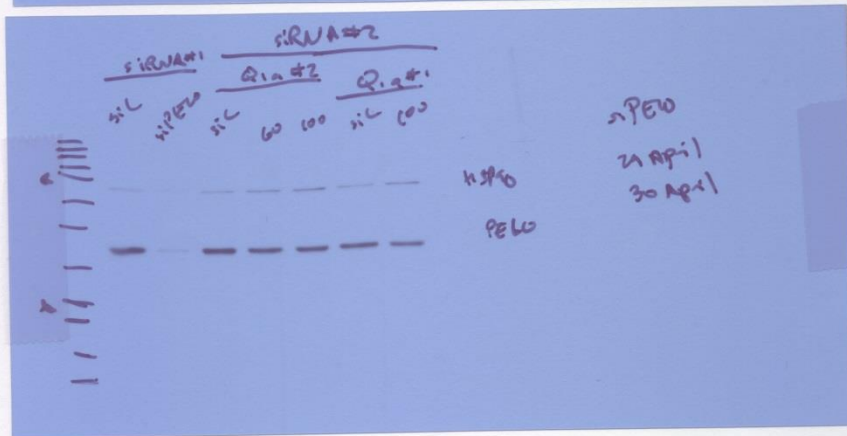

# PEW- Figure

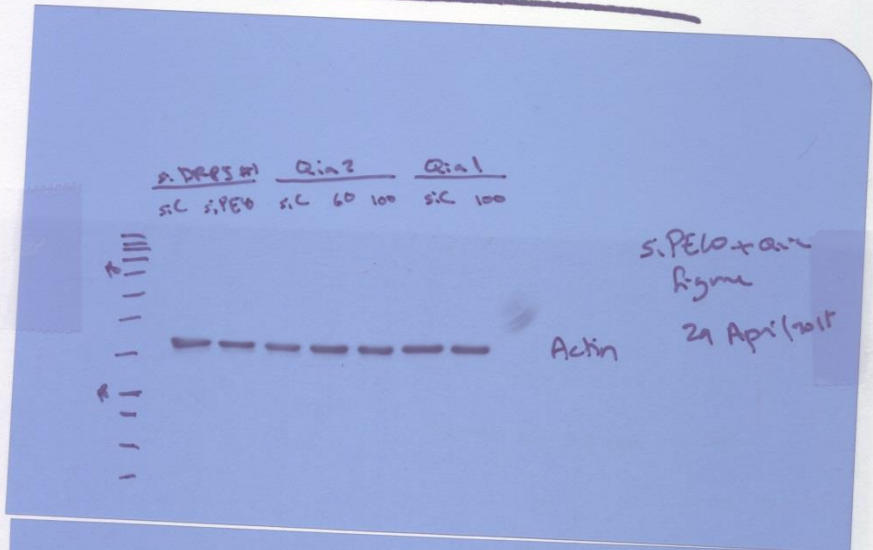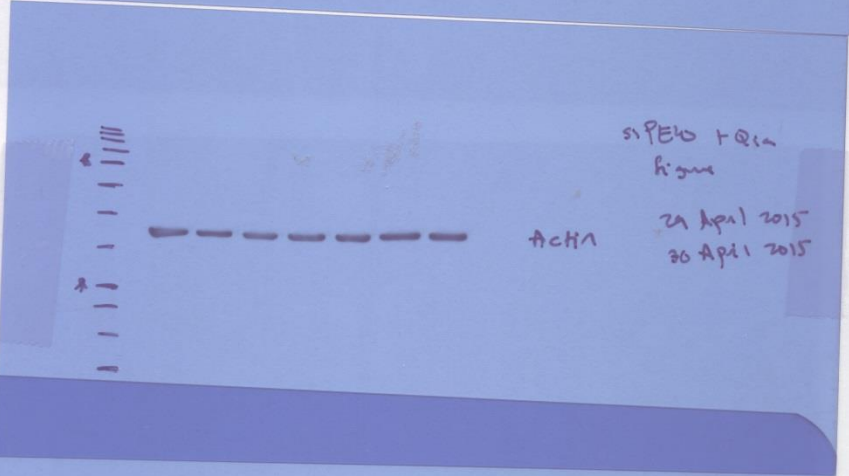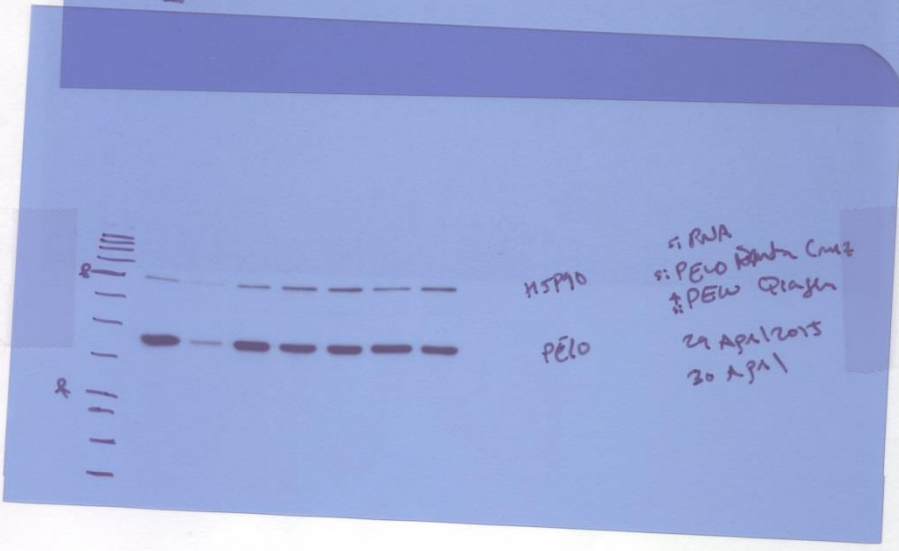

PEM-Response

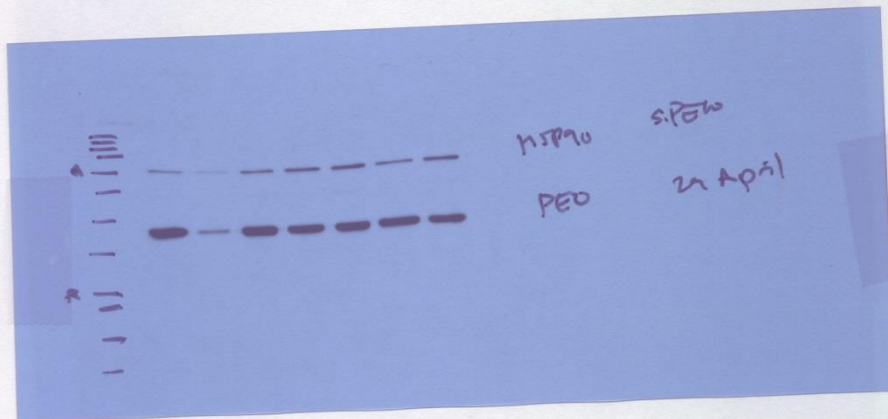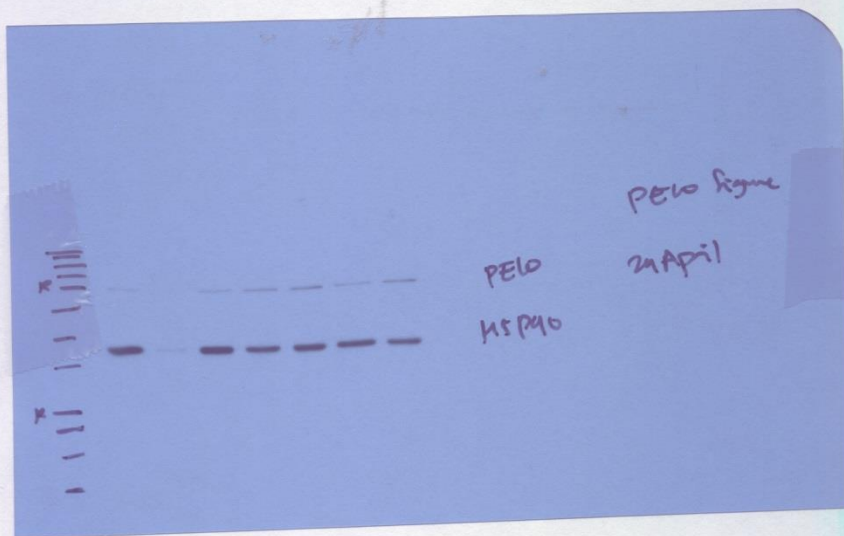

Supplement: full-length_uncropped_blots_(Figure_4).pdf [file full-length_uncropped_blots_%28Figure_4%29.pdf]
